# Supplementary material for: Monocytic Subclones Confer Resistance to Venetoclax-Based Therapy in Patients with Acute Myeloid Leukemia
Source: Oxford University Press journal article supplement (doi:10.1158/2159-8290.cd-19-0710), 2020-01-23
Supplement: 21598290cd190710-sup-224317_3_supp_6024348_q44rxx.xlsx [file 21598290cd190710-sup-224317_3_supp_6024348_q44rxx.xlsx]

## Sheet: Table S1
Supplementary Table S1. Clinical characteristics of 100 VEN+AZA treated patients.
Patient ID	Age	Sex	Prior MDS/MPN	ELN Risk Group	Baseline Molecular	Baseline Cytogenetics	FAB	Refractory by ELN
1	81	F	Y	Adverse	CUX1 T1151M, PTPN11 E76Q, RUNX1 R80C, TET2 S460F	45,XX,inv(3)(q21q26),-7[21]	M0-M1	N
2	73	M	N	Intermediate	NPM1, IDH1, DNMT3A, FLT3 D835, PTPN11	46,XY[20]	M0-M1	N
3	83	F	N	Favorable	TET2, PTPN11	46,XX,inv(16)(p13.1q22)[1]/48,sl,+8,+22[15]/47,sl,+add(8)(q22)[4]	M4	N
4	65	M	N	Adverse	ASXL1 W960X, PTPN11 E76V	48,XY,+8,der(11)t(11;?)(q23;?),+21[19]/46,XY[1]	M5	Y
5	66	F	N	Adverse	TP53 R175H, PTPN11 A72V	48,XX,+6,+21[19]/46,XX[1]; By FISH: Low level gain of chromosome 8 sequences	M5	Y
6	72	M	Y	Adverse	ASXL1, ETV6, SRSF2 P95H, BRAF G469A, PTPN11, KRAS	45,XY,-7[12]/46,XY[8]	M5	Y
7	80	F	N	Intermediate	SF3B1 K666N	46,XX,t(1;3)(p36.3;q21)[19]/46,XX[1]	M0-M1	N
8	73	F	Y	Adverse	SF3B1 K700E, RUNX1 R201X	46,XX[20]	M0-M1	N
9	75	M	Y	Intermediate	IDH2 R140L, SRSF2, TET2	46,XY[20]	M5	N
10	72	F	N	Favorable	NPM1, TET2, GATA2	46,XX[20]	M0-M1	N
11	59	M	N	Favorable	FLT3 TKD, NPM1	46,XY[20]	M5	N
12	85	M	N	Intermediate	IDH2, NRAS, SRSF2, SMC1A	47,XY,+8[12]/47,XY,+15[8]/46,XY[5]	M0-M1	N
13	73	F	N	Adverse	RUNX1, PHF6	46,XX[4]	M0-M1	N
14	79	M	Y	Adverse	JAK2, TP53, BCORL1	45,XY,add(3)(p21),add(5)(q31),add(9)(q13),-11,-17,+r[cp3]/45,sl,-22,+mar1[cp5]/44,sdl1,add(8)(p11.2),-add(9)(q13),+11,-16,+mar2[cp7]	M0-M1	N
15	79	M	N	Adverse	IDH2, ASXL1, RUNX1, SRSF2, FLT3, RAD21, PHF6	47,XY,+13[2]/46,XY[18]	M0-M1	N
16	70	F	N	Favorable	NPM1, FLT3 TKD, DNMT3A	46,XX,add(6)(q27)[15]/46,XX[9]	M0-M1	N
17	61	M	N	Adverse	ASXL1, SRSF2, STAG2, ZRSR2, RUNX1	46, XY	M0-M1	N
18	68	M	N	Adverse	NPM1, DNMT3A, FLT3 ITD, DIH2, RUNX1	46,XY[20]	M1	N
19	68	F	N	Adverse	FTL3 ITD , DNMT3A, NPM1,	46,XX[20]	M1	N
20	72	F	N	Adverse	NPM1, FLT3-ITD, DNMT3A	46, XX	M4	N
21	81	F	N	Favorable	FLT3 ITD, CEBPA, TET2, NPM1	46,XX[20]	M0-M1	N
22	72	F	N	Adverse	ASXL1, SETBP1, PHF6, MLL	46,XX[20	M1	N
23	68	F	N	Adverse	TP53	43,XX,del(5)(q22q35),add(6)(p21),-7,der(9)t(9;17)(q34;q11.2),add(15)(p11.2),-17,-18,-19,-21,+r1,+mar[2]/44,sl,+r2[17]/ by FISH gain of 8 centromee and 8q22	M1	N
24	79	F	N	Adverse	DNMT3A, IDH1	47,XX,del(5)(q21q33),-7,+8,+11[20]; by FISH loss of 6q22 and gain of 11q23	M1	N
25	74	M	N	Favorable	None	46,XY,inv(16)(p13.1q22)[7]/47,sl,+22[4]/47,sl,+8[3]/47,sdl2,add(7)(q22)[6]	M1	N
26	33	F	N	Adverse	ASXL1	46,XX,del(7)(q22q32)[5]/46,XX[15]	M1	N
27	73	F	Y	Intermediate	IDH1 R132	47,XX,+11[4]/46,XX[14]	M0-M1	N
28	71	F	N	Favorable	IDH1 R132, NPM1	46,XX[20]	M0-M1	N
29	78	F	Y	Adverse	FLT3 ITD, CEBPA R306C, BCOR R342X, EZH2 D608H	47,XX,+8[3]/46,XX[18]	M0-M1	N
30	73	M	Y	Adverse	ASXL1 G643fs, TET2 Q414X and E798X, SRSF2 P95H, GATA2 A318T	46,XY[20]	M4	N
31	76	M	N	Adverse	GATA2 A397fs, SRSF2 P95L, TET2 L579fs and N1484fs	45,XY,-7[14]/46,XY[6]	M0 (almost AUL)	N
32	75	F	N	Favorable	NPM1, CUX1 V83I, DNMT3A	46,XX[19]	M6a*	N
33	71	M	N	Intermediate	Not available	46,XY[12]	M0-M1	N
34	75	M	N	Intermediate	IDH1 R132, DNMT3A	46,XY[19]	M0-M1	N
35	75	M	Y	Adverse	IDH2 R140Q, ASXL1 P675fs, SRSF2	46,XY[20]	M0-M1	N
36	67	M	Y	Adverse	SF3B1 K700E, TET2 D1384E	monosomy 7	M0-M1	N
37	81	F	N	Adverse	IDH1 R132C, NPM1	46,XX,-7,+8[7]/47,sl,+8[6]/46,XX[6]	M0-M1	N
38	68	F	Y	Adverse	None	46,XX,add(2)(p21),del(4)(q22q28),del(16)(q23)[4]/47,s1,+21,18~58dmin[8]/86~90,slx2,-11,18~58dmin[cp2]	M0-M1	N
39	67	F	N	Intermediate	FLT3 ITD, IDH2 R140Q, NPM1	46,XX[20]	M0-M1	N
40	84	M	N	Intermediate	IDH2 R140Q, SRSF2 P95H, TET2 V1718L and N715fs, BCOR E401fs	46,XY[17]	M0-M1	N
41	75	F	Y	Adverse	FLT3 ITD, TET2 H1380D and P1889R, RUNX1 Y775fs, ASXL1 E865X, STAG2 Y775fs	trisomy 8	M0-M1	N
42	69	M	N	Adverse	IDH1, DNMT3A, RUNX1, EZH2	45,XY,-7[11]/46,XY[9] and low level del20q12 by FISH	M0-M1	N
43	81	F	N	Adverse	TP53 V272M	47,XX,-5,+11,-12,add(15)(q21),del(17)(p11.2),+mar1,+mar2[8]/47,sl,del(3)(p12),add(20)(q11.2)[4]/47,sdl1,-9,+mar3[7]/46,XX[2]	M0-M1	N
44	89	F	N	Adverse	IDH2 R172W, ASXL1 E635fs, JAK2, U2AF1 S34F	46,XX[20]	M0-M1	N
45	70	F	N	Intermediate	DNMT3A R882H, TET2 F1041fs and A1159P	46,XX[20]	M0-M1	N
46	77	F	N	Favorable	NPM1, SRSF2, TET2	46,XX[2]	M5	N
47	76	M	N	Intermediate	FLT3 ITD, NPM1, DNMT3A	45,X,-Y[20]	M0-M1	N
48	70	M	N	Intermediate	None	46,XY[19]	M0-M1	N
49	77	F	Y	Adverse	TP53 R273H	43,XX,der(3)t(3;17)(p11;q11.2),del(5)(q13q33),-11,-15,add(16)(q12-13),-17,-21,+der(?)t(?;11)(?;q12)[4]/	M4	N
50	68	F	N	Favorable	NPM1, DNMT3A, TET2	46,XX[20]	M5	N
51	65	M	N	Favorable	NPM1, IDH2, SRSF2	46,XX[20]	M0-M1	N
52	81	M	Y	Intermediate	SF3B1 K700E, RUNX1 R191X, RUNX1 insertion	45,X,-Y[20]	M0-M1	N
53	66	M	N	Adverse	IDH2 R140Q, DNMT3A R882H, PHF6, BCORL1	45,XY,-7[19]/46,XY[1]	M0-M1	N
54	62	F	N	Favorable	NPM1, IDH2 R140Q, DNMT3A	46,XX[20]	M0-M1	N
55	70	M	N	Adverse	RUNX1, RUNX1, SRSF2	94 < 4n > ,XXYY,+13,+13[2]/46,XY[17]	M0-M1	N
56	64	F	N	Favorable	NPM1, TET2, TET2	46,XX[20]	M0-M1	N
57	66	F	N	Intermediate	FLT3 ITD; NPM1	46,XX[19]	M0-M1	N
58	71	F	N	Adverse	IDH1 R132C, RUNX1, DNMT3A, MYD88	47,XX,+mar[18]/46,XX[2]; By FISH: Gain of 21q22 sequences, Low level gain of chromosome 5 sequences, Low level gain of 11q23 sequences	M0-M1	N
59	60	F	N	Favorable	DNMT3A, NPM1, IDH1	46,XX[20]	M1	N
60	72	M	N	Adverse	ASXL1, U2AF1 S34F, BCOR, NRAS, ETV6	46,XY,?add(17)(q22-24)[5]/46,XY[16] CALLING THIS NK	M0-M1	N
61	82	M	N	Adverse	RUNX, RUNX1, SRSF2 P95L	46,XY[5]; By FISH: Loss of 5q31 and 20q12 and gain of 11q23	M0-M1	N
62	73	M	N	Adverse	TP53	46,XY,del(5)(q13q31)[3]/56,sl,+Y,+1,+del(5)(q13q31),+8,+11,+13,+14,del(17)(p11.2),+21,+22,+22[16] and by FISH gain of 11q23	M1	N
63	75	F	N	Favorable	NPM1, PHF6, TET2	46,XX[19]	M4	N
64	67	M	N	Adverse	ASXL1, IDH2, SRSF2, NRAS, STAG2	47,XY,+8[4]/48,sl,+mar[5]/49,sdl1,+mar[3]/50,sdl2,+mar[3]/46,XY[2]	M1	N
65	65	F	N	Adverse	None	46,XX,der(9)t(9;11)(p21;p12-14),der(11)t(11;11)(p12-14;q23)t(9;11)(p21;q23)[18]/45,sl,-7[4]; By FISH KMT2A rearranement	M4	N
66	65	F	N	Adverse	TP53, JAK1, BCORL1	48,XX,add(4)(p11),-5,add(6)(p12),-7,+8,del(9)(q21q34),-13,add(17)(p11.1),+22, +r1,+r2,+mar[3]/49,sl,+r1[9]/51,sdl1,+r1,+r3[4]/47,sdl1,add(2)(q11.2),-3,add(6)(q13),add(13)(q14)[3]/46,XX[1] 47,sdl1,add(2)(q11.2),-3,add(6)(q13),add(13)(q14)[3]/46,XX[1]	M1	N
67	68	M	N	Favorable	FLT3 ITD, DNMT3A, IDH1, NPM1	der(18)t(11;18)(q13;q22),add(21)(q22),-22,+r,+mar1,+mar2,+mar3[cp12]/41~43,sl,-Y,add(1)(p36.1),	M1	N
68	88	M	Y	Adverse	DNMT3A, RUNX1, SF3B1, TET2	46,XY[18]	M0-M1	N
69	22	F	N	Adverse	NRAS	46,XX,t(6;11)(q27;q23)[11]/47,sl,+der(6)t(6;11)(q27;q23)[8]/46,XX[1]By FISH: Positive for an KMT2A (11q23) rearrangement, variant pattern, Loss of (17p13.1) TP53 sequences	M4	N
70	52	F	N	Adverse	FLT3 ITD, NPM1, IDH1 R132H, SRSF2	46,XX,add(17)(p11.2)[6]/46,XX[14] By FISH: Positive for TP53 deletion	M1	N
71	82	M	N	Adverse	None	46,XY,t(8;16)(p11.2;p13.3),+19[3]/49,sl,+8,+21[6]/49,sl,+r,+mar[2]/46,XY[9]	M5	Y
72	63	M	N	Adverse	ASXL1, NRAS, TET2	47,XY,+6[4]/49,sl,+6,+22[2]/49,sl,+4,+8,i(8)(q10)x2[5]/47,XY,+r[2]/46,XY[7]	M5	Y
73	75	F	N	Adverse	ASXL1, DNMT3A, RUNX1, U2AF1, BCORL1, PHF6, CBL, TET2	45,XX,-7[18]/90,slx2[2]	M0-M1	Y
74	73	M	N	Adverse	ASXL1, U2AF1	46,XY,add(10)(q2?3)[2]/46,XY[18]; By FISH: Low level loss of 5'-RARA (17q21.1) sequences	M2	Y
75	68	F	N	Adverse	ASXL1, RUNX1, TET2	47,XX,r(7)(p13q21),+21[14]/46,XX,-7,+21[5]	M0-M1	Y
76	59	F	N	Adverse	FLT3 ITD, DNMT3A, NPM1, ASXL1	46,XX,add(4)(q31)[20]	M4	N
77	66	M	N	Adverse	TP53	42~45,XY,add(2)(p11.2),-3,-5,-6,der(7)t(6;7)(p21;q22),add(11)(q12),add(12)(p11.2),-13,-16,-18,add(18)(q21),der(18)t(11;18)(q13;q22),add(21)(q22),-22,+r,+mar1,+mar2,+mar3[cp12]/41~43,sl,-Y,add(1)(p36.1), del(9)(q13),+mar4[cp6]/46,XY[2]By FISH: Loss of 7q31 sequences Low level gain of 8 centromere sequences	M0	N
78	70	F	Y	Adverse	TP53	45,XX,der(3)t(3;14)(p13;q12-21),del(5)(q13q33),der(8)t(1;8)(p32;q24),-12,-14,-17,+r,+mar[3]/44,sl,-22[13]/46,XX[2]	M0	N
79	89	M	N	Intermediate	SETBP1, SRSF2, TET2	46,XY[20]	M0	N
80	82	M	N	Adverse	U2AF1 Q157P	45,XY,-7[18]/90,slx2[2]	M0-M1	N
81	65	F	N	Adverse	None	50,XX,psu dic(5;3)(q11.2;p11),add(7)(q11.2),add(12)(q13),-13,-17,add(17)(p11.2),+psu dic(?;12)(?;p11.2),+r1x3,+mar1,+mar2,+mar3,+mar4[4]/48,sl,-22,-mar4[6]/48~51,sdl1,idic(8)(p11.1),-r1,+r2x3,-mar1,-mar2,+mar6[cp4]/45~47,sdl2,-7,-idic(8)(q11.1),+8,-20,-21,add(21)(p11.2),idic(22)(p11.2),-r2x2,+r3,+mar8[cp7]	M0-M1	N
82	61	F	Y	Favorable	NPM1, DNMT3A, SMC1A	46,XX[19]	M0-M1	N
83	72	M	N	Unknown	NPM1, IDH2, SRSF2	Study failure	M0-M1	N
84	80	M	N	Adverse	FT3 ITD, DNMT3A, SF3B1, STAG2	46,XY[20]	M1	N
85	84	F	N	intermediate	FLT3 ITD, NPM1, DNMT3A	46,XX[20]	M1	N
86	70	F	N	Adverse	IDH2, SRSF2, CEBPA, ASXL1	By FISH: Low level loss of 16q22 sequences	M1	N
87	24	F	N	Adverse	IDH2 R172K, CEPBA	46,XX,idic(7)(q11.1)[3]/46,sl,-idic(7)(q11.1),+psu idic(7)(q11.2)[9]/47,sdl1,+X,add(16)(p13.1)[2]46,XX[6]	M1	N
88	23	F	N	Adverse	FLT3 ITD, RUNX1	46,XX[20] By FISH: Loss of TP53 (17p13.1) sequences	M1	N
89	73	M	N	Adverse	ASXL1, RUNX1, WT1, CEBPA, EZH2, TET2	46, XY	M1	N
90	48	M	N	Adverse	SF3B1	46,XY,t(3;3)(q21;q26)[11]/46,XY[9]	M1	N
91	70	F	Y	Adverse	KIT, ASXL1, TET2	48,+X,idic(X)(q13)x2,del(20)(q11.2q13.1),+22[16]/49,sl,-idic(X)(q13),+add(X)(q13),+r[2]	M1	N
92	79	M	N	Adverse	ASXL1, RUNX1, RUNX1, EZH2, TET2, BCORL	47,XY,+8[2]/46,XY[18]	M1	N
93	36	M	Y	Adverse	IDH2 R172K, ASXL1, NRAS, PTPN11, SMC1A	47,XY,+8[6]/48,sl,+i(1)(q10)[7]/49,sdl1,+8[4]/49,sdl1,+2[2]	M5	N
94	74	M	N	Intermediate	FLT3 ITD, NPM1, TET2, TET2, GATA2	46,XY[20]	M0-M1	Y
95	64	M	N	Adverse	TP53, NRAS	By FISH: Loss of 7q31 sequences;Low level gain of 8 centromere sequences	M1	Y
96	68	M	N	Adverse	DNMT3A, NRAS, U2AF1, KMT2A	46,XY,t(6;11)(q27;q23)[19]/46,XY[1]	M1	Y
97	37	M	N	Adverse	SF3B1	46,XY,inv(3)(q21q26),inv(3)(q21q26)[6]/47,XY,+8[2]/46,XY[12]	M1	Y
98	53	M	N	Adverse	FLT3 ITD, KMT2A	46,XY[20]	M5	Y
99	63	M	Y	Favorable	DNMT3A, NPM1, ETV6, KRAS, GATA2	46,XY[18]	M5	Y
100	78	F	N	Adverse	KRAS, PTPN11	48,XY,der(10)t(10;13)(q21;q14),+12,der(13)t(10;13)(q21;q12),+19[16]/46,XY[3].	M5	Y

## Sheet: Table S2
Supplementary Table S2. Clinical characteristics of 12 primary AML specimens.
AML ID	Patient	Diagnosis	Age	Sex	Karyotyping	Mutations
mono-AML-1	Pt-A	De novo	74	F	Normal karyotype	NPM1+ and FLT3 TKD mutation (D835)
mono-AML-2	Pt-B	Relapse	65	F	weird cyto abnormality of additional material (14q)	Mutant for FLT3, NPM1 and IDH1
mono-AML-3	Pt-C	De novo	60	F	46,XX,t(9;11)(p21;q23)[13]/47,sl,+21[4]/47,sl,+8[3]	KRAS, PTPN11
mono-AML-4	Pt-D	De novo	NA	NA	45,X,-Y; t(9;11)(p22;q23)	Mutant for FLT3
mono-AML-5	Pt-E	NA	NA	NA	46,XX,inv(3)(q21q26)[10]	NA
prim-AML-1	Pt-F	Relapse	36	NA	Normal karyotype	TET2.I1762V, ASXL1.L815P, CUX1.A448T, BCORL1.F111L, TP53.P33R
prim-AML-2	Pt-G	NA	NA	NA	+8q, +3q, t(9;22)/+8q, +3q, t(9;22), +3, +10, +12 +13, +15 +20/ +8q, +3q, t(9;22), +3, +10, +12 +13, +15 +20, der (22); by FISH -7	FLT3-ITD+, WT for NPM1, CEBPA, IDH1 and IDH2
prim-AML-3	Pt-H	De novo	73	F	45,XX,add(3)(q27),-7,add(8)(q24),t(9;22)(q34;q11.2)[4]/54,sl,+3,-add(3)(q27),+7,+8,+10,+12,+13,+15,+20,+der(22)t(9;22)(q34;q11.2)[16]	WT for FLT3, NPM1, CEBPA, IDH1 and IDH2
prim-AML-4	Pt-I	De novo	21	M	inv(16) (p13.1q22)	NA
prim-AML-5	Pt-J	Relapse	79	M	46,XY,t(6;9) (p21;q34)	FLT3 ITD+ and FLT3 TKD mutation (D835); IDH2 R140Q; WT for CEBPA, NPM1, IDH1 and JAK2
prim-AML-6	Pt-K	De novo	49	F	Normal karyotype (46, XX)	FLT3 ITD+; WT for CEBPA, NPM1, IDH1, IDH2, JAK2
prim-AML-7	Pt-L	Relapse	49	F	Normal karyotype (46, XX)[21]	FLT3 ITD+

## Sheet: Table S3
Supplementary Table S3. Gene symbols of 49 Commonly mutated genes in AML.
Gene
ASXL1
CEBPA
GATA2
JAK3
MYD88
PTPN11
SRSF2
BCOR
CSF3R
GNAS
KDM6A
NOTCH1
RAD21
STAG2
BCOR1
DNMT3A
HRAS
KIT
NPM1
RUNX1
TET2
BRAF
ETV6
IDH1
KMT2A
NRAS
SETBP1
TP53
CALR
EZH2
IDH2
KRAS
PHF6
SF3B1
U2AF1
CBL
FLT3
JAK1
MEK1
PML
SMC1A
WT1
CBLB
GATA1
JAK2
MPL
PTEN
SMC3
ZRSR2

## Sheet: Table S4
Supplementary Table S4. Leukemia stem cell signatures.
Somervaille et al. MLL-specific LSC Up	Somervaille et al. MLL-specific LSC Down	Ng et al. LSC Up	Ng et al. LSC Down	Ng et al. LSC core 17	Eppert et al. LSC Up
CCT8	ZC3H11B	CD34	SLC25A37	CD34	NIPAL2
SLC16A1	ZC3H11A	SPINK2	SGK	LAPTM4B	RBPMS
CCT7	RAF1	LAPTM4B	LOC652694	ARHGAP22	TRAF3IP2
CALU	TPST2	HOXA5	ITPR3	KIAA0125	PPP1R10
SUCLG1	LITAF	GUCY1A3	LOC654103	MMRN1	ATP1B1
PEBP1	SLC31A2	SHANK3	CXCR4	DNMT3B	NF1
USP14	TP53INP1	ANGPT1	FCRL3	SOCS2	RBPMS
IMP3	PSME1	ARHGAP22	RBM38	CDK6	FLJ13197
NDUFC1	PTPN1	LOC284422	LILRA5	CPXM1	RBPMS
TIMM8A	PSME2	MYCN	IL18RAP	ZBTB46	ABCG1
CTPS1	CDK9	KIAA0125	CCDC109B	DPYSL3	CLN5
NDUFA9	IQGAP1	MAMDC2	ISG20	NYNRIN	LRRC8B
RP11-234B24.6	STARD3	PRSSL1	MTSS1	GPR56	FRMD4B
ATP5B	NFKBIZ	GPSM1	CECR1	AKR1C3	ZFP30
NDUFB2	CTSB	HOXA9	ADAM19	EMP1	C17orf86
PDE6D	TGM2	MMRN1	FCGR2A	SMIM24	C16orf5
MRPL51	ITGB5	FSCN1	AIM2	NAFRAP1	TGIF2
RRS1	ITGB5	DNMT3B	NPL		RABGAP1
LAMP3	MKNK1	HOXA6	IL10RA		PPIG
KRTCAP2	LSP1	AIF1L	CTSL1		GPR56
RRP15	PNPLA8	SOCS2	GNLY		EIF2S3
FTSJ1	RELB	CDK6	CKAP4		NAB1
ANGPTL4	SH3GLB1	CPXM1	ADM		LRRC61
KDELR2	SH3GLB1	FAM69B	KLRB1		ATP1B1
CHCHD4	MYO9B	NGFRAP1	SLC15A3		ZNF500
SNRPA1	MAPK7	C3orf54	FGR		CSDE1
XRCC6	SLC12A9	TNFRSF4	FCRLA		C2CD2
CKS2	INPP5D	ZBTB46	IL2RB		PAQR6
CKS2	VPS54	DPYSL3	CXCL16		FAM119B
LYAR	SF3B1	NYNRIN	SLC4A1		ARPP-19
SLC35A1	SLFN12L	COL24A1	GZMH		SETDB1
SFXN1	SLFN12	FAM30A	FLJ22662		ZBTB39
SFXN1	UBE2H	C10orf140	LOC647506		RBPMS
SLC25A37	ATP7A	GPR56	GIMAP4		SLC9A7
PXMP2	LILRB5	SPNS2	JAZF1		MAP3K7
DDX19A	LILRB4	AKR1C3	CTSH		ARL3
ILF2	LILRA6	FLT3	GZMA		ZNF304
ILF2	LILRB3	TFPI	CHST15		LOC552889
MRPL39	LILRA5	KCNK17	AQP9		VGLL4
PSME3	LILRA4	EPDR1	CD247		UBR5
BCAS2	AP1G2	C1orf150	BCL6		PTCD2
MTF2	TLR2	BIVM	SLC7A7		CRKRS
SERBP1	MAP3K8	H2AFY2	E2F2		IQGAP2
CETN2	CYP4F3	VWF	LOC647450		PLCH1
DUT	CYP4F2	EMP1	GZMB		ARFGEF1
MRPL35	CYP4F11	RAGE	LOC652493		MAP3K7
MYB	CYP4F8	ATP8B4	HBM		PNPLA4
TXNRD1	CYP4F12	SMIM24	CD14
IPP	SLAMF9	NAFRAP1	ALAS2
FIGNL1	TPD52	GATA2	HBB
ATAD3C	NUPR1		LOC642113
ATAD3A	CSF1R		AHSP
ATAD3B	CSF1R		FCN1
RP11-603J24.9	USP7		CD48
PA2G4	MAF1		HBA2
RPS27L	MYH9		HBA1
MRPL45	TBC1D14
PDCD2	CLEC4E
METAP2	CLEC4E
COASY	SLC11A1
FARSB	SAT1
WDR36	SLC15A3
ETFA	CLEC7A
PTTG1	CLEC4D
PTTG2	KIF3B
RWDD4	KIF3B
GEMIN6	PTGER4
AP000275.65	CCR2
RFC4	SAMSN1
POLR2H	KLF3
C21orf91	KCNH3
SMYD2	MSN
TASP1	NR3C1
TYMS	SH3BP5
CDC16	PTPRC
GTF2I	PDE4B
DLAT	SMAD4
DLAT	SMAD4
THAP12	AMPD3
GTF2F2	RASSF5
GSPT1	RASSF5
GALNT2	DGAT2
AC005338.1	XPO6
PTPRS	CYBB
HSDL2	PITPNA
SUCLG2	MYADM
SSBP3	CSK
CDC73	CSF1R
COQ9	CCNL1
ETFB	SRPRA
DYNLRB1	UNC93B1
EXOSC8	NEK9
CCDC6	PPP4R1
EBNA1BP2	TMEM140
PPAT	LEPROT
MRPL41	CREB3
AASDHPPT	SLC25A28
XPOT	TMEM106A
MTF1	TNRC6A
C4orf46	ITGAL
UTP11	POLB
MTX2	RAF1
TMED5	GCNT2
IDH3A	SNRK
DCUN1D5	EPS8
NUDT19	BTG1
CENPP	TOR1AIP1
NARS2	CD244
SEPHS1	RIN2
METAP2	KIAA0513
NUDT19	PLCL2
AGPAT5	ADD3
SERF1B	YPEL3
SERF1A	NIPA2
PHKB	CKAP4
ST13	RAB8B
METAP2	KIAA0922
CLNS1A	TBC1D23
RBM14	CAMTA2
ENOPH1	PLCG2
MRPL44	MLXIP
E2F6	HERC4
DKC1	IL13RA1
AKR7A2	IL13RA1
AKR7L	AKNA
AKR7A3	PILRB
OCRL	PILRA
PEBP1	IFNAR2
LINC00116	LCN2
POLR3K	CD300LD
TRIM45	OTOA
PPP1R3E	C6orf120
STRBP	C6orf120
HDAC2	ATP13A2
DRG1	HCFC1R1
EXOSC7	C9orf72
MRPL18	SNAPC3
RAD1	CSNK1G1
ACP6	STX17
NDUFB2	RSC1A1
NUDT5	CYLD
UBQLN4	KLF3
E2F6	APH1B
MRPS16	PIK3AP1
TMEM186	ZBP1
EEF1E1-BLOC1S5	UBE2J2
HDAC2	DNAJB14
MTF2	NAPSA
DTYMK	SNX10
MYB	TSEN34
CBX5	AP2A2
DTD1	CCNL2
TTC4	HAAO
MRPL50	KLF13
NUDT3	CD80
DLAT	C16orf54
CACYBP	GNS
STRBP	GNS
DGCR6L	SLC44A1
AC007325.4	RNF141
DGCR6	PNRC1
ILKAP	PLD4
PCBD2	TRIO
VKORC1	MIER1
RP11-196G11.1	NISCH
CAD	TPM4
UTP18	CPEB2
TRIM37	TRPS1
CDK2AP1	SAMD8
RBM14	RFFL
TMEM69	KIAA0513
RSBN1	C16orf72
WDR61	CCM2
ENY2	RALGPS1
HTRA2	CRISPLD2
TIMM17B	VAMP4
	2019-03-01
	2019-03-01
	FYB
	TMEM106A
	TTC7A
	ITGAL
	HIST3H2A
	CD300C
	CD300A
	KIAA0513
	ARHGAP30
	TMEM71
	IKZF1
	SFXN5
	RRBP1
	CYBB
	CYBB
	TMSB10
	ATP7A
	WIPF1
	SLC12A6
	OLFM4
	CDC14B
	ARPC2
	TMSB10
	RTN4
	TMEM154
	ZNF513
	MCL1
	VPS37C
	EIF5A2
	GRN
	ANXA7
	ZBTB20
	GPR18
	TNRC6A
	GPNMB
	MYADM
	HERPUD2
	TM2D2
	NADK
	LMO4
	C5AR1
	IFNAR2
	2019-03-01
	2019-03-01
	SP100
	CALCRL
	MYH9
	MPPE1
	IFT122
	FKBP15
	ACTR2
	SLA
	MKRN1
	WHSC1L1
	FYB
	SLC12A9
	RTN4
	MIER1
	BCL10
	NF1
	PRAM1
	SMAD4
	TMEM19
	MALT1
	C1orf54
	SYTL3
	SENP6
	HCK
	GNS
	ZNF263
	ANXA1
	GPNMB
	CORO1B
	LRRFIP1
	NPC2
	MVD
	FTH1
	SNRK
	SCAND1
	MAPK13
	IFNAR1
	RNF141
	VPS54
	GPR65
	ST3GAL5
	MMP8
	BST1
	HCK
	RIPK1
	ITGB2
	RNASE3
	RNASE2
	GPR35
	LTF
	EVI2A
	CTD-2370N5.3
	ZFP36L1
	TREX1
	STARD5
	FPR1
	SQSTM1
	XDH
	CTDSP2
	RNH1
	PICALM
	APOBEC1
	IL13RA1
	CD80
	EPSTI1
	FYB
	LRPAP1
	NISCH
	SKIL
	AKNA
	LILRB5
	LILRB4
	LILRA6
	LILRB3
	LILRA5
	LILRA4
	TP53INP2
	ATP13A2
	IL6ST
	TNFAIP8L2
	FYCO1
	CFLAR
	CCDC9
	SLC37A3
	CCNL2
	TCP11L2
	KLF3
	KIAA0232
	BMF
	SYNJ1
	CKAP4
	SSH2
	TNRC6A
	MPP7
	UBP1
	FKBP15
	SPIRE1
	COL1A1
	MAP3K9
	TM9SF2
	MALT1
	SSH2
	ITGB5
	PAG1
	MALT1
	TTC14
	GRN
	C16orf72
	PFKFB4
	TMOD3
	PHF20L1
	GDI2
	DEGS1
	TRPS1
	PCMTD2
	RP11-435I10.4
	CLN3
	SPIRE1
	CPEB2
	B4GALT1
	FDFT1
	SPIRE1
	SH3BGRL
	STK10
	SNX10
	PPP4R3B
	IRF5
	ST3GAL5
	CRISPLD2
	SAMD9L
	CDC42

## Sheet: Table S5
Supplementary Table S5. Reagents.
	Item	Source	Catalog
Drugs	Venetoclax	Abbvie	NA
	VU661013	Stephen W. Fesik	NA
	Azacitidine	Celgene	NA
	Oligomycin	Sigma	871744
	FCCP	Sigma	C2920
	Antimycin A	Sigma	A8774
	Rotenone	Sigma	R8875
Media	DMSO	Sigma	D8418
	IMDM	Gibco	31980030
	FBS	Corning	35-011-CV
	BIT-9500	Stemcell Technologies	09500
	Low Density Lipoportein	Millipore	437644
	2-Mercaptoethanol	Gibco	21985-023
	Pen/Strep	Gibco	15140-122
	FLT-3	PeproTech	300-19
	IL-3	PeproTech	200-03
	SCF	PeproTech	300-07
	Human Methylcellulose Complete Media	R&D Systems	390395
	Seahorse XF base media	Agilent Technologies	102353-100
	1M glucose	Agilent Technologies	103577-100
	100mM Pyruvate	Agilent Technologies	103578-100
	200mM Glutamine	Agilent Technologies	103579-100
Antibodies	HRP-anti-Actin	Santa Cruz	47778
	Ms-anti-BCL2	Santa Cruz	509
	Ms-anti-MCL1	Cell Signaling	5453
	HRP-anti-mouse	BioRad	170-6516
	Anti-human CD3	BioXCell	BE0001-2
	Anti-CD45-FITC	BD	561865
	Anti-CD3-PECY7	BD	557749
	Anti-CD19-PE	BD	555413
	Anti-CD34-BV421	BD	562577
	Anti-CD64-BV510	Biolegend	305027
	Anti-CD117-BV605	BD	562687
	Anti-CD68-PECF594	BD	564944
	Anti-CD11b-APC-CY7	Biolegend	301342
	Anti-AnnexinV-PercpCy5.5	BD	561431
Other reagents	CellRox-DeepRed	Life Technologies	C10422
	DAPI	Sigma	268298
	DNAse	Sigma	18047-019
	Cell-Tak	Corning	324240
Commercial kits	Cytofix/Cytoperm kit	BD	554714
	Extracellular flux assay kits XF96	Agilent Technologies	102417-100
Mouse models	NSG-S (NOD.Cg-Prkdcscid Il2rgtm1Wjl Tg(CMV-IL3,CSF2, KITLG)1Eav/MloySzJ)	The Jackson Laboratory	JAX:013062

## Sheet: Table S6
Supplementary Table S6. Oligo antibodies used in the CITE-seq analysis.
Antigen	Cat	Product	Clone
CD4	344649	TotalSeqTM-A 0045 anti-human CD4	SK3
CD7	343123	TotalSeqTM-A 0066 anti-human CD7	CD7-6B7
CD56	362557	TotalSeqTM-A 0047 anti-human CD56 (NCAM)	5.1H11
CD3	344847	TotalSeqTM-A 0049 anti-human CD3	SK7
CD33	366629	TotalSeqTM-A 0052 anti-human CD33	P67.6
CD34	343537	TotalSeqTM-A 0054 anti-human CD34	581
CD90	328135	TotalSeqTM-A 0060 anti-human CD90 (Thy1)	5E10
CD117	313241	TotalSeqTM-A 0061 anti-human CD117 (c-kit)	104D2
CD45RA	304157	TotalSeqTM-A 0063 anti-human CD45RA	HI100
CD123	306037	TotalSeqTM-A 0064 anti-human CD123	6H6
CD14	301855	TotalSeqTM-A 0081 anti-human CD14	M5E2
HLA-DR	307659	TotalSeqTM-A 0159 anti-human HLA-DR	L243
CD11b	301353	TotalSeqTM-A 0161 anti-human CD11b	ICRF44
CD64	305037	TotalSeqTM-A 0162 anti-human CD64	10.1
CD38	303541	TotalSeqTM-A 0389 anti-human CD38	HIT2
CD45	368543	TotalSeqTM-A 0048 anti-human CD45	2D1
CD36	336225	TotalSeqTM-A 0407 anti-human CD36	5-271
CD93	336121	TotalSeqTM-A 0446 anti-human CD93	VIMD2
CD9	312119	TotalSeqTM-A 0579 anti-human CD9	HI9a
